# Supplementary material for: Indocyanine Green—Mediated Photodynamic Therapy Reduces Methicillin-Resistant Staphylococcus aureus Drug Resistance
Source: PubMed Central journal article supplement (PMC6463108; doi:10.3390/jcm8030411), 2019-03-25
Supplement: jcm-08-00411-s001.pdf [file jcm-08-00411-s001.pdf]

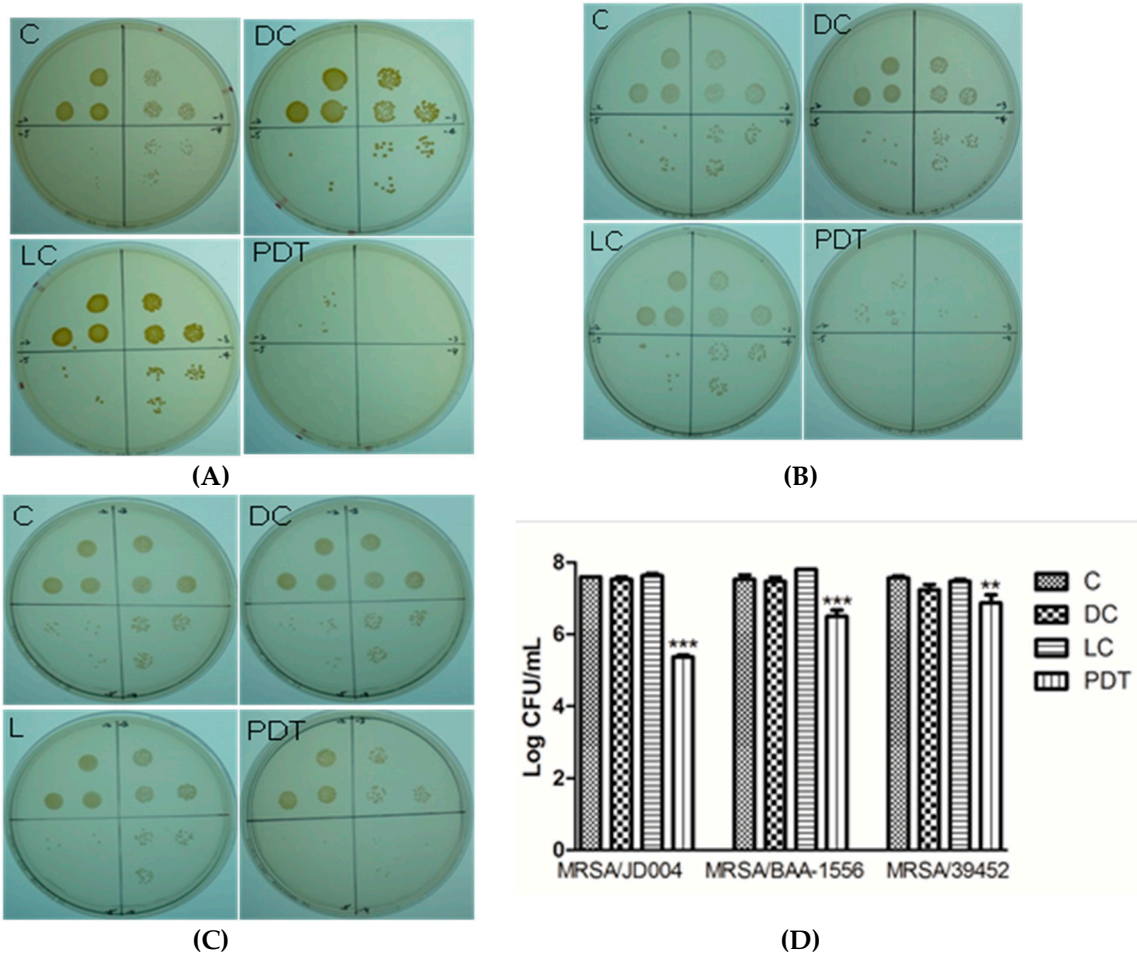

**Figure S1.** Indocyanine green (ICG)-photodynamic inactivation (25  $\mu\text{g}/\text{mL}$  ICG, near-infrared (NIR) 100  $\text{J}/\text{cm}^2$  at 65.5  $\text{mW}/\text{cm}^2$ ) of three clinical Methicillin-resistant *Staphylococcus aureus* (MRSA) strains evaluated with disk-diffusion assay. Bacteria counts in CFU/mL of **(A)** MRSA/JD004, **(B)** MRSA/BAA-1556, and **(C)** MRSA/39452 were calculated by serial dilution and bacterial drop-plate count methods. An agar plate was allocated into four quadrants. Each quadrant was reserved for one dilution in the 10-fold serial dilutions. Each quadrant contained three drops of 20  $\mu\text{L}$  bacterial suspension. **(D)** Average data were pooled from three independent experiments with triplicated samples. \*\*  $p < 0.01$ , and \*\*\*  $p < 0.001$  in comparison with the absolute control group. Each bar was the mean of three determinations  $\pm$  standard deviation. C: absolute control; DC: dark control; LC: light control; PDT: photodynamic therapy.

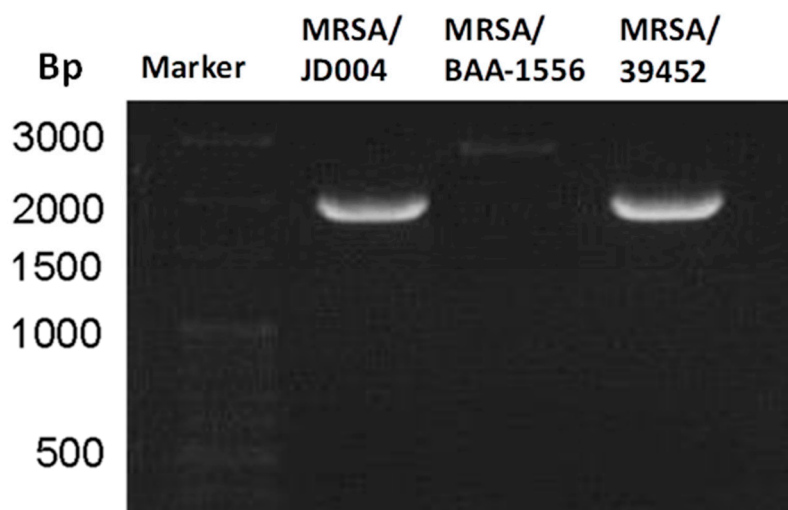

**Figure S2.** *Mec* complex typing of three MRSA clinical isolates. MRSA/JD004, MRSA/BAA-1556, and MRSA/39452 were isolated from patients' wounds. *Mec* genes were typed according to Kondo et al., using the multiplex PCR method. MRSA/JD004 and MRSA/39452 belonged to Class A and MRSA/BAA-1556 belonged to Class B.

**Table 1.** Breakpoints of MRSA inhibition-zone diameters and minimum-inhibitory-concentration (MIC) values according to the CLSI criteria.

| Antibiotics     | Disk content     | Zone diameter (mm) |           | MIC value ( $\mu\text{g/ml}$ ) |           |
|-----------------|------------------|--------------------|-----------|--------------------------------|-----------|
|                 |                  | Resistant          | Sensitive | Resistant                      | Sensitive |
| Oxacillin (OX)  | 1 $\mu\text{g}$  | $\leq 10$          | $\geq 13$ | $\geq 4$                       | $\leq 2$  |
| Cefoxitin (FOX) | 30 $\mu\text{g}$ | $\leq 21$          | $\geq 22$ | $\geq 8$                       | $\leq 4$  |

**Table 2.** The PCR primers used in this study.

| Genes        | Primers                                | Amplification size (bp) | References |
|--------------|----------------------------------------|-------------------------|------------|
| <i>mecA</i>  | 5' ATGAAAAAGATAAAAATTGTTCCAC 3'        | 2007                    |            |
|              | 5' TTATTCATCTATATCGTATTTTTTATT 3'      |                         |            |
| <i>mecR1</i> | 5' TGGTATTTGGTTTAGTGAA 3'              | 414                     | [46]       |
|              | 5' GATTAGGTTTAGGCATTGA 3'              |                         |            |
| <i>mecI</i>  | 5' AATGGCGAAAAAGCACAACA 3'             | 480                     | [46]       |
|              | 5' GACTTGATTGTTTCCTCTGTT 3'            |                         |            |
| IS1272       | 5'- GTGATTCTATATGCCTACACACAA TC -3'    | 1512                    |            |
|              | 5'- AGCAATAAAAAAATAAATCATAATGAGTCC -3' |                         |            |

| Genes           | Primers                                                         | Amplification size (bp) | References |
|-----------------|-----------------------------------------------------------------|-------------------------|------------|
| <i>IS431</i>    | 5'-ATGAACTATT<br>TCAGATATAAACAATTTAACA -3'                      | 674                     |            |
|                 | 5'- TTAAGTTGCTAGCATGATGCTA -3'                                  |                         |            |
| <i>16s rRNA</i> | 5'-GTTATTAGGGAAGAACATATGTG-3'<br>5'-CCACCTTCCTCCGGTTTGTCCACC-3' | 750                     | [47]       |
